# Supplementary material for: Clinical‐Like Cryotherapy in Acute Knee Arthritis Protects Neuromuscular Junctions of Quadriceps and Reduces Joint Inflammation in Mice
Source: Hindawi journal article supplement (doi:10.1155/2022/7442289), 2022-01-01
Supplement: f1 [file 7442289.f1.pdf]

1 **Supplementary Materials**

2

3 **Figure S1 - Mouse positioned during the cryotherapy session**

4

5

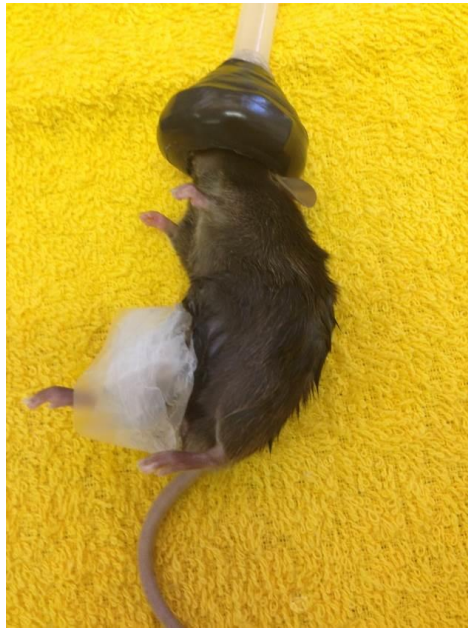

6

7

8

9

10

11

12

13

14

15

16

17

18

19

20

21

22

23

24

25 **Figure S2 - User's Guide: Using confocal microscopy for analysis of neuromuscular**  
 26 **junction (NMJ)**

27 This user guide comprises a workflow designed for use in conjunction with Figure 3 and Table  
 28 2 of the manuscript. The following descriptions guide the user through the analysis steps of  
 29 each NMJ using *Image J software*. The instructions in italics refer to the functions selectable  
 30 from the *Image J software* menus. See the manuscript for further explanations and definitions  
 31 of individual terms. Contact Castro, P.A.T.S. by email: [paula.soupat@gmail.com](mailto:paula.soupat@gmail.com).

32

33 **1.Determining the working scale**

34 Open your image by *File - Open*, then on the bar scale of your figure make an overlap of the  
 35 size using the / (*straight line*) icon. Click *Analyze - set scale* and enter the bar scale value in  
 36 the *Know distance* item and set the *unit of length in  $\mu\text{m}$*  item. To analyze all the figures in the  
 37 study, click *Global* and standardize the scale of the complete experiment. Click on *Analyze -*  
 38 *set measurements* and define which statistical measures you want to use to analyze your study  
 39 of the figure (in our study, *area* parameters were used for Figure 3).

40

41 **2.Selecting your image**

42 After viewing the RGB image, via *Image - Color - Split channel*, select the channel (*red, green*  
 43 *or blue*) you want to work on.

44

45 **3.Threshold Targeting**

46 Particle analysis requires the image to be binary. For this image transformation, *Image - Adjust*  
 47 *- Threshold*. Pixels within the threshold range are displayed in red. The user changes to *Dark*  
 48 *background - Apply* and then the image threshold is converted to a binary image.

49

50 **4. Defining the background area**

51 To define the *area*, draw a rectangle in the *background area* and press *Ctrl+C*, then go to *File*  
 52 *- New - Internal Clipboard*. A *Clipboard* window will open. In the *Clipboard* window, press  
 53 *Ctrl+M* and save *the result of the background area* (it will be used as a normalizer).

54

55 **5. Definition of total sample area**

56 Analysis of the *sample area* requires the parameters of the *Analyze - Set scale* in *area*. To  
 57 define the area, draw a rectangle in the desired *sample area* and press *Ctrl+C*, then go to *File*

58 - *New - Internal Clipboard*. A Clipboard window will open. In the *Clipboard window*, press  
59 *Ctrl+M* and save the result of the *sample area*.

60

61 **6. Definition of fragmented area**

62 With the same rectangle established for the *sample area*, the *fragmented area* is defined using  
63 the *Wand (tracing) tool*. In the *Clipboard window*, press *Ctrl+M* and save the result of the  
64 *fragmented area*.

65

66

67

68

69

70

71

72

73

74

75

76

77

78

79

80

81

82

83

84

85

86

87 **Figure S3 - Oligonucleotide primers used for real-time PCR amplification of reverse**  
 88 **transcribed RNA.**

|                                                  |                                |                       |
|--------------------------------------------------|--------------------------------|-----------------------|
| <b>Housekeeping</b>                              | GAPDH foward                   | CCTTTTCAAGCGTCTTCCTG  |
|                                                  | GAPDH reverse                  | CTCCTGGCTTCTGTCTTTGG  |
|                                                  | HPRT foward                    | GTGCAACCATTGCCCTAAGT  |
|                                                  | HPRT reverse                   | CAGCCAGCATCTCAGGTGTA  |
|                                                  | BETA ACTINA foward             | GACGGCCAGGTCATCACTAT  |
|                                                  | BETA ACTINA reverse            | AAGGAAGGCTGGAAAAGAGC  |
|                                                  | B2M foward                     | ATGGGAAGCCGAACATACTG  |
|                                                  | B2M reverse                    | CAGTCTCAGTGGGGGTGAAT  |
| <b>Nicotinic Acetylcholine Receptors (nAChR)</b> | $\gamma$ -nAChR foward         | CCACCAGAAGGTGGTGTCT   |
|                                                  | $\gamma$ -nAChR reverse        | TGAGGAGATGAGCACACAGG  |
|                                                  | $\alpha$ 1-nAChR foward        | TCCCAGCATCTAGCACACAG  |
|                                                  | $\alpha$ 1-nAChR reverse       | GAAAGGCACCACCAAACAGT  |
|                                                  | $\epsilon$ -nAChR foward       | CCAGGAAACCCTCTCTTCC   |
|                                                  | $\epsilon$ -nAChR reverse      | ATGACTGTGGAAGGGTCAGG  |
| <b>Neuromuscular Signaling Pathway</b>           | AGRIN foward                   | GCACACCTTCGAGAGAGACC  |
|                                                  | AGRIN reverse                  | CATGTGGAGTTGTGGGAGTG  |
|                                                  | MUSK foward                    | AGCCGATGTGTCTGCTCTTT  |
|                                                  | MUSK reverse                   | AGTGTGCGGGGACATACTTC  |
|                                                  | RAPSYN foward                  | ACGGACAGGTCCACAACACTC |
|                                                  | RAPSYN reverse                 | AGCAGGTCCAGCCTCTACAA  |
| <b>Atrophy Pathway</b>                           | MURF-1 foward                  | CTCCCCTTTGTGGTGTGTCT  |
|                                                  | MURF-1 reverse                 | GAGGCAGGAGGCACACTTAG  |
|                                                  | ATROGIN-1 foward               | CTCACGGAACACTTTGCTGA  |
|                                                  | ATROGIN-1 reverse              | CACCTTCACCTGACACATGG  |
|                                                  | $\alpha$ -DISTROBREVIN foward  | CCTATCTGCACCAGCCTAGC  |
|                                                  | $\alpha$ -DISTROBREVIN reverse | AGCGGAGTTAGGCACTGAAA  |
|                                                  | UTROPHIN foward                | AGCACAGGGAAGCTGGAGT   |
| UTROPHIN reverse                                 | GGAAGTTGAAGCAGGTGAGC           |                       |

89

90

91
